# Supplementary material for: Isolation of Bacteria from Freeze-Dried Samples and the Functional Characterization of Species-Specific Lactic Acid Bacteria with a Comparison of Wild and Captive Proboscis Monkeys
Source: MDPI journal article supplement (doi:10.3390/microorganisms11061458), 2023-05-31
Supplement: s1 [file s1]

Table S1. Degradation of carbohydrates by *Lactobacillus nasalidis* and related species.

| isolated from                 | <i>L. nasalidis</i>      |      |                          |                   |                   |                   |                   | <i>L.delbrueckii</i><br>subsp. <i>indicus</i> | <i>L.equicursoris</i>     |
|-------------------------------|--------------------------|------|--------------------------|-------------------|-------------------|-------------------|-------------------|-----------------------------------------------|---------------------------|
|                               | wild proboscis<br>monkey |      | captive proboscis monkey |                   |                   |                   |                   | Indian dairy<br>products                      | thoroughbred<br>racehorse |
|                               | SR01                     | SR02 | YZ01 <sup>T</sup> *      | YZ02 <sup>*</sup> | YZ03 <sup>*</sup> | YZ04 <sup>*</sup> | YZ05 <sup>*</sup> | JCM 15610 <sup>T</sup> *                      | JCM 14600 <sup>T</sup> *  |
| 0 Control                     | -                        | -    | -                        | -                 | -                 | -                 | -                 | -                                             | -                         |
| 1 Glycerol                    | -                        | -    | -                        | -                 | -                 | -                 | -                 | -                                             | -                         |
| 2 Erythritol                  | -                        | -    | -                        | -                 | -                 | -                 | -                 | -                                             | -                         |
| 3 D-Arabinose                 | -                        | -    | -                        | -                 | -                 | -                 | -                 | -                                             | -                         |
| 4 L-Arabinose                 | -                        | -    | -                        | -                 | -                 | -                 | -                 | -                                             | -                         |
| 5 D-Ribose                    | -                        | -    | -                        | -                 | -                 | -                 | -                 | -                                             | -                         |
| 6 D-Xylose                    | -                        | -    | -                        | -                 | -                 | -                 | -                 | -                                             | -                         |
| 7 L-Xylose                    | -                        | -    | -                        | -                 | -                 | -                 | -                 | -                                             | -                         |
| 8 D-Adonitol                  | -                        | -    | -                        | -                 | -                 | -                 | -                 | -                                             | -                         |
| 9 Methyl-β D-Xylopyranoside   | -                        | -    | -                        | -                 | -                 | -                 | -                 | -                                             | -                         |
| 10 D-Galactose                | -                        | +    | -                        | -                 | -                 | -                 | -                 | -                                             | +                         |
| 11 D-Glucose                  | +                        | +    | +                        | +                 | +                 | +                 | +                 | +                                             | +                         |
| 12 D-Fructose                 | +                        | +    | +                        | +                 | +                 | +                 | +                 | +                                             | +                         |
| 13 D-Mannose                  | -                        | +    | +                        | +                 | +                 | +                 | +                 | +                                             | +                         |
| 14 L-Sorbose                  | -                        | -    | -                        | -                 | -                 | -                 | -                 | -                                             | -                         |
| 15 L-Rhamnose                 | -                        | -    | -                        | -                 | -                 | -                 | -                 | -                                             | -                         |
| 16 Dulcitol                   | -                        | -    | -                        | -                 | -                 | -                 | -                 | -                                             | -                         |
| 17 Inositol                   | -                        | -    | -                        | -                 | -                 | -                 | -                 | -                                             | -                         |
| 18 D-Mannitol                 | -                        | -    | -                        | -                 | -                 | -                 | -                 | -                                             | -                         |
| 19 D-Sorbitol                 | -                        | -    | -                        | -                 | -                 | -                 | -                 | -                                             | -                         |
| 20 Methyl-α D-Mannopyranoside | -                        | -    | -                        | -                 | -                 | -                 | -                 | -                                             | -                         |
| 21 Methyl-α D-Glucopyranoside | -                        | -    | -                        | -                 | -                 | -                 | -                 | -                                             | -                         |
| 22 N-Acetyl Glucosamine       | +                        | +    | +                        | +                 | +                 | +                 | +                 | +                                             | +                         |
| 23 Amygdalin                  | +                        | +    | +                        | +                 | +                 | +                 | +                 | -                                             | w                         |
| 24 Arbutin                    | +                        | +    | +                        | +                 | +                 | +                 | +                 | -                                             | +                         |
| 25 Esculin ferric citrate     | +                        | w    | +                        | +                 | +                 | +                 | +                 | +                                             | +                         |
| 26 Salicin                    | +                        | +    | +                        | +                 | +                 | +                 | +                 | -                                             | +                         |
| 27 D-Cellobiose               | +                        | +    | +                        | +                 | +                 | +                 | +                 | -                                             | +                         |
| 28 D-Maltose                  | +                        | +    | +                        | +                 | +                 | +                 | +                 | -                                             | +                         |
| 29 D-Lactose                  | +                        | +    | +                        | +                 | w                 | -                 | w                 | +                                             | +                         |
| 30 D-Melibiose                | -                        | -    | -                        | -                 | -                 | -                 | -                 | -                                             | w                         |
| 31 D-Sucrose                  | +                        | +    | +                        | +                 | +                 | +                 | +                 | +                                             | +                         |
| 32 D-Trehalose                | +                        | +    | +                        | +                 | +                 | +                 | +                 | -                                             | -                         |
| 33 Inulin                     | -                        | -    | -                        | -                 | -                 | -                 | -                 | -                                             | -                         |
| 34 D-Melezitose               | -                        | -    | -                        | -                 | -                 | -                 | -                 | -                                             | -                         |
| 35 D-Raffinose                | w                        | w    | -                        | -                 | -                 | -                 | -                 | -                                             | w                         |
| 36 Starch                     | -                        | -    | -                        | -                 | -                 | -                 | -                 | -                                             | w                         |
| 37 Glycogen                   | -                        | -    | -                        | -                 | -                 | -                 | -                 | -                                             | -                         |
| 38 Xylitol                    | -                        | -    | -                        | -                 | -                 | -                 | -                 | -                                             | -                         |
| 39 Gentiobiose                | +                        | +    | +                        | +                 | w                 | +                 | w                 | -                                             | +                         |
| 40 D-Turanose                 | -                        | -    | -                        | -                 | -                 | -                 | -                 | -                                             | -                         |
| 41 D-Lyxose                   | -                        | -    | -                        | -                 | -                 | -                 | -                 | -                                             | -                         |
| 42 D-Tagatose                 | -                        | -    | -                        | -                 | -                 | -                 | -                 | -                                             | -                         |
| 43 D-Fucose                   | -                        | -    | -                        | -                 | -                 | -                 | -                 | -                                             | -                         |
| 44 L-Fucose                   | -                        | -    | -                        | -                 | -                 | -                 | -                 | -                                             | -                         |
| 45 D Arabitol                 | -                        | -    | -                        | -                 | -                 | -                 | -                 | -                                             | -                         |
| 46 L Arabitol                 | -                        | -    | -                        | -                 | -                 | -                 | -                 | -                                             | -                         |
| 47 Gluconate                  | -                        | -    | -                        | -                 | -                 | -                 | -                 | -                                             | -                         |
| 48 2-Keto Gluconate           | -                        | -    | -                        | -                 | -                 | -                 | -                 | -                                             | -                         |
| 49 5-Keto Gluconate           | -                        | -    | -                        | -                 | -                 | -                 | -                 | -                                             | -                         |
| +                             | 13                       | 14   | 14                       | 14                | 12                | 13                | 12                | 7                                             | 13                        |
| w                             | 1                        | 2    | 0                        | 0                 | 2                 | 0                 | 2                 | 0                                             | 4                         |
| -                             | 36                       | 34   | 36                       | 36                | 36                | 37                | 36                | 43                                            | 33                        |

\* Data from Suzuki-Hashido et al. [14]. +, Positive; -, negative; w, weakly positive.

Table S2. Enzyme activity *Lactobacillus nasalidis* and related species.

| isolated from                          | <i>L. nasalidis</i>      |      |                          |        |        |        |        | <i>L. delbrueckii</i><br>subsp. <i>indicus</i> | <i>L. equicursoris</i>    |
|----------------------------------------|--------------------------|------|--------------------------|--------|--------|--------|--------|------------------------------------------------|---------------------------|
|                                        | wild proboscis<br>monkey |      | captive proboscis monkey |        |        |        |        | Indian dairy<br>products                       | thoroughbred<br>racehorse |
|                                        | SR01                     | SR02 | YZ01 <sup>T</sup> *      | YZ02 * | YZ03 * | YZ04 * | YZ05 * | JCM 15610 <sup>T</sup> *                       | JCM 14600 <sup>T</sup> *  |
| 1 Control                              | -                        | -    | -                        | -      | -      | -      | -      | -                                              | -                         |
| 2 Phosphatase alkaline                 | -                        | -    | -                        | -      | -      | w      | w      | -                                              | -                         |
| 3 Esterase (C 4)                       | w                        | -    | w                        | w      | w      | w      | w      | w                                              | w                         |
| 4 Esterase lipase (C 8)                | -                        | -    | w                        | w      | w      | w      | -      | w                                              | w                         |
| 5 Lipase (C 14)                        | -                        | -    | -                        | -      | -      | w      | -      | -                                              | -                         |
| 6 Leucine aminopeptidase               | +                        | +    | w                        | +      | w      | +      | +      | +                                              | +                         |
| 7 Valine aminopeptidase                | -                        | -    | -                        | w      | w      | w      | w      | w                                              | -                         |
| 8 Cystine aminopeptidase               | w                        | w    | -                        | w      | -      | w      | -      | w                                              | w                         |
| 9 Trypsin                              | -                        | -    | -                        | -      | -      | -      | -      | -                                              | w                         |
| 10 Chymotrypsin                        | w                        | w    | -                        | -      | -      | w      | -      | w                                              | w                         |
| 11 Phosphatase acid                    | w                        | w    | +                        | +      | +      | +      | +      | +                                              | w                         |
| 12 Naphthol-AS-BI-<br>phosphohydrolase | +                        | w    | +                        | +      | +      | +      | +      | +                                              | +                         |
| 13 $\alpha$ -Galactosidase             | -                        | -    | -                        | -      | -      | -      | -      | w                                              | +                         |
| 14 $\beta$ -Galactosidase              | +                        | +    | +                        | +      | w      | w      | w      | +                                              | +                         |
| 15 $\beta$ -Glucuronidase              | -                        | -    | -                        | -      | -      | -      | -      | -                                              | -                         |
| 16 $\alpha$ -Glucosidase               | w                        | w    | w                        | w      | w      | w      | w      | -                                              | +                         |
| 17 $\beta$ -Glucosidase                | +                        | +    | w                        | +      | +      | +      | +      | w                                              | w                         |
| 18 $\beta$ -Glucosaminidase            | -                        | -    | -                        | -      | -      | -      | -      | -                                              | -                         |
| 19 $\alpha$ -Mannosidase               | -                        | -    | -                        | -      | -      | -      | -      | -                                              | -                         |
| 20 $\alpha$ -Fucosidase                | -                        | -    | -                        | -      | -      | -      | -      | -                                              | -                         |
| +                                      | 4                        | 3    | 3                        | 5      | 3      | 4      | 4      | 4                                              | 5                         |
| w                                      | 5                        | 5    | 5                        | 5      | 6      | 9      | 5      | 7                                              | 7                         |
| -                                      | 11                       | 12   | 12                       | 10     | 11     | 7      | 11     | 9                                              | 8                         |

\* Data from Suzuki-Hashido et al. [14]. +, Positive; -, negative; w, weakly positive.
